# TABLE OF CONTENTS

# ANESTHESIOLOGY

Volume 140  
Issue 2  
February 2024

|                                                         |            |
|---------------------------------------------------------|------------|
| <b>This Month in ANESTHESIOLOGY .....</b>               | <b>A1</b>  |
| <b>Science, Medicine, and the Anesthesiologist.....</b> | <b>A13</b> |
| <b>Infographics in Anesthesiology .....</b>             | <b>A17</b> |
| <b>Editorial</b>                                        |            |

|                                                                                                                                                                  |     |
|------------------------------------------------------------------------------------------------------------------------------------------------------------------|-----|
| <b>COVID-19 and Surgery: Getting Back to Business</b><br><i>P. S. Myles .....</i>                                                                                | 183 |
| <b>Structure–Function Relationships Determining Hypoxemia in COVID-19 Acute Respiratory Distress Syndrome</b><br><i>K. M. Capaccione, M. F. Vidal Melo .....</i> | 186 |
| <b>Monitoring Argatroban Anticoagulation in the Critically Ill: All Tests Are Not Created Equal</b><br><i>G. Erdoes, A. Koster, J. H. Levy .....</i>             | 189 |
| <b>Leveraging Endogenous Pain Modulation for Analgesia</b><br><i>Q. Chen, J. D. Clark .....</i>                                                                  | 192 |

## Perioperative Medicine

### CLINICAL SCIENCE

|                                                                                                                                                                                                                                                                                                                |     |
|----------------------------------------------------------------------------------------------------------------------------------------------------------------------------------------------------------------------------------------------------------------------------------------------------------------|-----|
| <b>◆◆◆ Perioperative Mortality of the COVID-19 Recovered Patient Compared to a Matched Control: A Multicenter Retrospective Cohort Study</b><br><i>M. F. Aziz, K. Schenning, S. Koike, A. O'Glasser, V. N. O'Reilly-Shah, V. Sera, M. Mathis, Multicenter Perioperative Outcomes Group Investigators .....</i> | 195 |
|----------------------------------------------------------------------------------------------------------------------------------------------------------------------------------------------------------------------------------------------------------------------------------------------------------------|-----|

In a retrospective observational cohort study in patients presenting for elective inpatient surgery between April 2020 and April 2021, patients with a previous positive test for COVID-19 before the surgery had an elevated risk of perioperative mortality and pulmonary complications but not kidney injury. The risk was less if the positive test was more than 2 weeks before surgery.

|                                                                                                                                                                                                                    |     |
|--------------------------------------------------------------------------------------------------------------------------------------------------------------------------------------------------------------------|-----|
| <b>◆◆ Target-controlled Infusion of Remimazolam in Healthy Volunteers Shows Some Acute Tolerance</b><br><i>R. Vellinga, J. V. Koomen, D. J. Eleveld, T. Stöhr, M. Pesic, M. M. R. F. Struys, P. J. Colin .....</i> | 207 |
|--------------------------------------------------------------------------------------------------------------------------------------------------------------------------------------------------------------------|-----|

The pharmacokinetic-pharmacodynamic relationships between remimazolam concentrations and Modified Observer's Assessment of Alertness and Sedation scores and bispectral index were assessed in 24 healthy volunteers using step-up and step-down target-controlled infusions to determine clinically appropriate target concentrations. Target concentration-dependent sedation was observed with little effect on vital signs. A difference in the sedative effects of remimazolam at identical target concentrations was observed between the step-up and step-down parts of the titration scheme that could not be explained by a bias in the predicted target concentrations. Pharmacodynamic models for Modified Observer's Assessment of Alertness and Sedation scores and bispectral index that assumed tolerance development described the observed difference in the sedative effects between the step-up and step-down parts of the titration scheme.

|                                                                                                                                                                                                                                                                                               |     |
|-----------------------------------------------------------------------------------------------------------------------------------------------------------------------------------------------------------------------------------------------------------------------------------------------|-----|
| <b>◆◆ Association of Patient Race and Hospital with Utilization of Regional Anesthesia for Treatment of Postoperative Pain in Total Knee Arthroplasty: A Retrospective Analysis Using Medicare Claims</b><br><i>A. A. Dixit, G. Sekeres, E. R. Mariano, S. G. Memtsoudis, E. C. Sun .....</i> | 220 |
|-----------------------------------------------------------------------------------------------------------------------------------------------------------------------------------------------------------------------------------------------------------------------------------------------|-----|

Among 733,406 primary total knee arthroplasty surgeries between January 1, 2011, and December 31, 2016, in the Medicare database, 90.7% of patients identified as White, 4.7% as Black, and 4.6% as Other. Black patients did not have a statistically different probability of receiving a regional anesthetic compared to White patients (adjusted estimates: Black, 53.3% [95% CI, 52.5 to 54.1%]; White, 52.7% [95% CI, 52.4 to 54.1%];  $P = 0.132$ ). After adjustment for other patient-level confounders, 42.0% of the variation in block administration was attributable to the hospital, compared to less than 0.01% to race. Race was not associated with administration of regional anesthesia in Medicare patients undergoing primary total knee arthroplasty.

◆◆ Refers to This Month in ANESTHESIOLOGY

◆ Refers to Editorial

🔊 This article has an Audio Podcast

🌐 See Supplemental Digital Content

📺 CME Article

🎬 This article has a Video Abstract

🔍 Readers' Toolbox

👁️ This article has a Visual Abstract

🔓 This article is Open Access

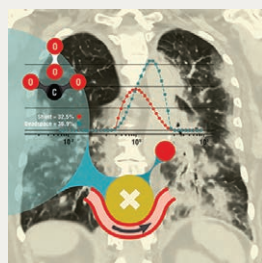

**ON THE COVER:** A state-of-the-art assessment of the different causes of hypoxemia (shunt, ventilation–perfusion mismatch, and diffusion limitation) in COVID-19 acute respiratory distress syndrome (ARDS) is currently lacking. In this study, Busana *et al.* hypothesized a multifactorial genesis of hypoxemia and aimed to measure the relative contribution of each of the different mechanisms and their relationship with the distribution of tissue and blood within the lung. In an accompanying editorial, Capaccione and Vidal Melo examine the physiologic determinants of hypoxemia, relevant techniques and methods to identify and address hypoxemia, and new research on hypoxemia during COVID-19 ARDS. Cover illustration: A. Johnson, Vivo Visuals Studio.

- Busana *et al.*: Causes of Hypoxemia in COVID-19 Acute Respiratory Distress Syndrome: A Combined Multiple Inert Gas Elimination Technique and Dual-energy Computed Tomography Study, p. 251
- Capaccione and Vidal Melo: Structure–Function Relationships Determining Hypoxemia in COVID-19 Acute Respiratory Distress Syndrome, p. 186

- Effect of Extracerebral Contamination on Near-infrared Spectroscopy as Revealed during Organ Donation: A Prospective Observational Study in Brain-dead Organ Donors**  
*M. Soehle, J. Langer, E. Schindler, S. Manekeller, M. Coburn, M. Thudium* .....231

Brain-dead patients (who have absent cerebral circulation) show surprisingly high cerebral oxygen saturation, which then drops when the aorta is clamped and extracerebral circulation ceases. These observations call into question the reliability of near-infrared spectroscopy in detecting isolated cerebral ischemia.

## BASIC SCIENCE

- Increasing Levels of Positive End-expiratory Pressure Cause Stepwise Biventricular Stroke Work Reduction in a Porcine Model**  
*G. Wood, T. L. Madsen, W. Y. Kim, M. D. Lyhne* .....240

This study of six healthy, anesthetized female pigs found that stepwise increases in positive end-expiratory pressure (PEEP) were associated with biventricular decreased stroke work as assessed using biventricular pressure-volume loop recordings. Higher PEEP had divergent effects on right *versus* left ventricle for key hemodynamic variables including arterial elastance, ejection fraction, ventriculo-arterial coupling, and end-systolic pressures. The impact of PEEP was more notable and potentially detrimental for the right ventricle compared to the left ventricle.

## Critical Care Medicine

### CLINICAL SCIENCE

- Causes of Hypoxemia in COVID-19 Acute Respiratory Distress Syndrome: A Combined Multiple Inert Gas Elimination Technique and Dual-energy Computed Tomography Study**  
*M. Busana, A. Rau, S. Lazzari, S. Gattarello, M. Cressoni, L. Biggemann, L.-O. Harnisch, L. Giosa, A. Vogt, L. Saager, J. Lotz, B. Meller, K. Meissner, L. Gattinoni, O. Moerer* .....251

The authors found shunt, ventilation-perfusion mismatch, and potentially diffusion limitation or postpulmonary shunting in COVID-19 acute respiratory distress syndrome (ARDS). The authors also found an excess of blood volume compared to the tissue in well-aerated regions but not with atelectasis. The findings support the concept of a multifactorial genesis of hypoxemia, in which alveolar factors, typical of ARDS, are combined with vascular factors, more typical of pulmonary embolism, all of which contribute to the overall severity of the disease.

- Monitoring of Argatroban in Critically Ill Patients: A Prospective Study Comparing Activated Partial Thromboplastin Time, Point-of-Care Viscoelastic Testing with Ecarin Clotting Time and Diluted Thrombin Time to Mass Spectrometry**  
*L. Heubner, R. Oertel, O. Tiebel, N. Mehlig-Warnecke, J. Beyer-Westendorf, M. Mirus, M. Roessler, B. Renner, P. M. Spieth* .....261

Although activated partial thromboplastin time monitoring of argatroban is the most commonly used test, diluted thrombin time and point-of-care viscoelastic ecarin clotting times provide improved guidance for optimal dosing and identifying overdosing.

## Pain Medicine

### BASIC SCIENCE

- Opposing Effects on Descending Control of Nociception by  $\mu$  and  $\kappa$  Opioid Receptors in the Anterior Cingulate Cortex**  
*E. Navratilova, C. Qu, G. Ji, V. Neugebauer, M. Guerrero, H. Rosen, E. Roberts, F. Porreca* .....272

Microinjection of  $\kappa$  opioid receptor antagonists into the anterior cingulate cortex of nerve injured rats restored descending control of nociception, an endogenous pain control circuit. Microinjection of selective  $\kappa$  opioid receptor agonists reduced descending control of nociception in sham injured rats confirming the importance of the  $\kappa$  opioid receptor in regulating endogenous pain control.

## Education

### CLASSIC PAPERS REVISITED

- Discovering the Clinical Relevance of Heart-Lung Interactions**  
*M. R. Pinsky* .....284

### IMAGES IN ANESTHESIOLOGY

- Complicated Airway Management Because of Multiple Tracheal Diverticula in a Patient with Mounier-Kuhn Syndrome**  
*C. Liang, L. Zhang, J. Yu, C. Miao* .....291

### CLINICAL FOCUS REVIEW

- Perioperative Management for Complex Spine Fusion Surgery**  
*L. M. Carabini, T. R. Koski, J. F. Bebawy* .....293

Complex spine surgeries performed worldwide continue to increase in number, as do the age and comorbidity of patients undergoing these operations. Perioperative care protocols related to blood management, postoperative pain control, and intraoperative measures to mitigate morbidity may improve clinical workflows and patient outcomes.

# Meaning and Management of Perioperative Oliguria

R. T. Tallarico, I. E. McCoy, F. Dépret, M. Legrand.....304

Perioperative oliguria is an alarm signal. The initial assessment includes closer patient monitoring, evaluation of volemic status, risk–benefit analysis of fluid challenge or furosemide stress test, and investigation of possible perioperative complications.

## REVIEW ARTICLE

# Consciousness and General Anesthesia: Challenges for Measuring the Depth of Anesthesia

Y. Jiang, J. Sleight.....313

The authors discuss the concept of consciousness, how it is altered by anesthetics, the challenges for assessing consciousness, currently used technologies for assessing anesthesia levels, and future research directions.

## MIND TO MIND

### Treading Through Twilight

B. R. Smith.....329

### The Walk

E. C. Raffensberger.....330

## Correspondence

## RESEARCH LETTERS

# Appropriateness of Answers to Common Preanesthesia Patient Questions Composed by the Large Language Model GPT-4 Compared to Human Authors

S. Segal, A. K. Saha, A. K. Khanna.....333

# Awake Total Neuromuscular Blockade as Experienced by Anesthesiologist Volunteers

P. J. Schuller, L. J. Voss, J. J. Barry.....336

# Incidence of Process Complications during Awake Flexible Bronchoscopic Intubation in Anticipated Difficult Airway Management

I. T. Yang, A. Tung, K. Flores, K. S. Berenhaut, J. A. Choi, Y. F. Bryan.....339

## LETTERS TO THE EDITOR

### Prolonged Opioid Use and Pain after Surgery: Comment

A. Patel, U. Al-Shehab.....343

### Prolonged Opioid Use and Pain after Surgery: Comment

J. E. Chelly.....344

### Prolonged Opioid Use and Pain after Surgery: Reply

K. Kuck, N. L. Pace, B. I. Naik, K. B. Domino, K. L. Posner, L. Saager.....345

# ASA Consensus-based Guidance on Preoperative Management of Patients on Glucagon-like Peptide-1 Receptor Agonists

D. S. Ushakumari, R. N. Sladen.....346

## Anesthesiology Reflections from the Wood Library-Museum

### Jay J. Jacoby, Pied Piper of Anesthesiology

A. J. Schwartz, J. S. Moon.....303

## Careers & Events.....A19

## INSTRUCTIONS FOR AUTHORS

The most recently updated version of the Instructions for Authors is available at [www.anesthesiology.org](http://www.anesthesiology.org). Please refer to the Instructions for the preparation of any material for submission to ANESTHESIOLOGY.

Manuscripts submitted for consideration for publication must be submitted in electronic format via Editorial Manager (<https://www.editorialmanager.com/aln>). Detailed directions for submission and the most recent version of the Instructions for Authors can be found on the Journal's Web site (<http://www.anesthesiology.org>). Books and educational materials for review should be sent to Alan Jay Schwartz, M.D., M.S.Ed., Director of Education, Department of Anesthesiology and Critical Care Medicine, The Children's Hospital of Philadelphia,

34th Street and Civic Center Blvd., Room 9327, Philadelphia, Pennsylvania 19104-4399. Article-specific permission requests are managed with Copyright Clearance Center's Rightslink service. Information can be accessed directly from articles on the journal Web site. More information is available at <http://anesthesiology.pubs.asahq.org/public/rightsandpermissions.aspx>. For questions about the Rightslink service, e-mail [customer-care@copyright.com](mailto:customer-care@copyright.com) or call 877-622-5543 (U.S. only) or 978-777-9929. Advertising and related correspondence should be addressed to Advertising Manager, ANESTHESIOLOGY, Wolters Kluwer Health, Inc., Two Commerce Square, 2001 Market Street, Philadelphia, Pennsylvania 19103 (Web site: <http://www.wkand-center.com/>). Publication of an advertisement in an ASA publication or on an ASA website does not constitute endorsement or evaluation by ASA or by ASA's publishing partners of the product or service described therein or of any representations or claims made by the advertiser with respect to the product or service.

**ANESTHESIOLOGY** (ISSN 0003-3022) is published monthly by Wolters Kluwer Health, Inc., 1800 Dual Highway, Suite 201, Hagerstown, MD 21740-6636. Business office: Two Commerce Square, 2001 Market Street, Philadelphia, PA 19103. Periodicals postage paid at Hagerstown, MD, and at additional mailing offices. Copyright © 2024 American Society of Anesthesiologists. All Rights Reserved.

**Annual Subscription Rates:** *United States*—\$1238 Individual, \$3228 Institution, \$476 In-training. *Rest of World*—\$1238 Individual, \$3518 Institution, \$476 In-training. Single copy rate \$313. Subscriptions outside of North America must add \$58 for airfreight delivery. Add state sales tax, where applicable. The GST tax of 7% must be added to all orders shipped to Canada (Wolters Kluwer Health, Inc.'s GST Identification #895524239, Publications Mail Agreement #119672). Indicate in-training status and name of institution. Institution rates apply to libraries, hospitals, corporations, and partnerships of three or more individuals. Subscription prices outside the United States must be prepaid. Prices subject to change without notice. Subscriptions will begin with currently available issue unless otherwise requested. Visit us online at [www.lww.com](http://www.lww.com).

Individual and in-training subscription rates include print and access to the online version. Online-only subscriptions for individuals (\$447) and persons in training (\$447) are available to nonmembers and may be ordered by downloading a copy of the Online Subscription FAXback Form from the Web site, completing the information requested, and faxing the completed form to 301-223-2400. Institutional rates are for print only; online subscriptions are available via Ovid. Institutions can choose to purchase a print and online subscription together for a discounted rate. Institutions that wish to purchase a print subscription, please contact Wolters Kluwer Health,

Inc., 1800 Dual Highway, Suite 201, Hagerstown, MD 21740-6636; phone: 800-638-3030; fax: 301-223-2400. Institutions that wish to purchase an online subscription or online with print, please contact the Ovid Regional Sales Office near you or visit [www.ovid.com/site/index.jsp](http://www.ovid.com/site/index.jsp) and select Contact and Locations.

**Address for non-member subscription information, orders, or change of address:** Wolters Kluwer Health, Inc., 1800 Dual Highway, Suite 201, Hagerstown, MD 21740-6636; phone: 800-638-3030; fax: 301-223-2400.

**Address for member subscription information, orders, or change of address:** Members of the American Society of Anesthesiologists receive the online journal with their membership. To become a member or provide a change of address, please contact the American Society of Anesthesiologists, 1061 American Lane, Schaumburg, Illinois 60173-4973; phone: 847-825-5586; fax: 847-825-1692; e-mail: [membership@ASA.org](mailto:membership@ASA.org). For all other membership inquiries, contact Wolters Kluwer Health, Inc., Customer Service Department, P.O. Box 1610, Hagerstown, MD 21740; phone: 800-638-3030; fax: 301-223-2400.

**Postmaster:** Send address changes to ANESTHESIOLOGY, P.O. BOX 1610, Hagerstown, MD 21740.

**Advertising:** Please contact Kelle Gray, National Account Manager, Health Learning, Research & Practice, Medical Journals, Wolters Kluwer Health, Inc.; phone: 843-261-4221; e-mail: [Kelle.Gray@wolterskluwer.com](mailto:Kelle.Gray@wolterskluwer.com). For classified advertising: Dave Wiegand, Recruitment Advertising Representative, Wolters Kluwer Health, Inc.; phone: 847-361-6128; e-mail: [Dave.Wiegand@wolterskluwer.com](mailto:Dave.Wiegand@wolterskluwer.com).
